# Supplementary material
Source: PubMed Central journal article supplement (PMC6205432)
Supplement: pnas.1810003115.sapp.pdf [file pnas.1810003115.sapp.pdf]

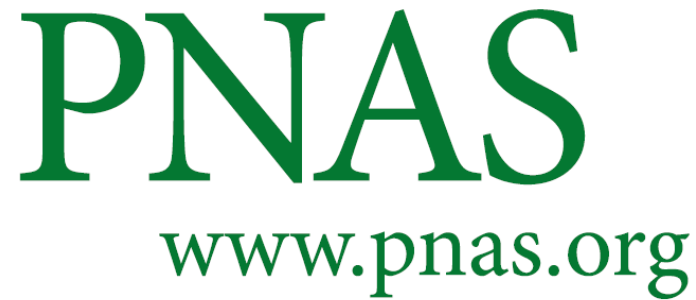

## **Supplementary Information for**

### **Topological Quantum Computation Based on Chiral Majorana Fermions**

**Biao Lian, Xiao-Qi Sun, Abolhassan Vaezi, Xiao-Liang Qi and Shou-Cheng Zhang**

**Shou-Cheng Zhang.**

**E-mail: [sczhang@stanford.edu](mailto:sczhang@stanford.edu)**

#### **This PDF file includes:**

Supplementary text

Figs. S1 to S4

References for SI reference citations

## Supporting Information Text

The supplementary material is organized as follows. In Sec. 1 we show the 2D lattice Hamiltonians of QAHI and  $p + ip$  TSC we use for calculations of entanglement entropy change in the QAHI-TSC-QAHI junction and conductance in the Corbino junction. Sec. 2 gives the details of entanglement entropy numerical calculation for a QAHI-TSC-QAHI junction lattice model during the evolution of an incident electron above the fermi sea. Sec. 3 reviews the generalized Landauer-Büttiker formula for two-terminal conductance of a superconducting junction, while Sec. 4 shows the numerical calculation for  $\sigma_{12}$  oscillation of a Corbino junction in a 2D lattice as a function of the gate voltage  $V_G$ . Sec. 5 shows that the nonzero chemical potential on QAHI edges induces a phase shift to  $\phi_G$  in the formula of  $\sigma_{12}$  in the Corbino junction. Finally, in Sec. 6, we provide a Bloch sphere illustration of the single qubit quantum gate that we propose to implement by the Corbino junction.

### 1. Model Hamiltonian for simulation

In this section, we present the 2D lattice model Hamiltonian that we will use for later numerical calculations. The structures that we study in the main text consists of a quantum anomalous Hall insulator (QAHI), where we add s-wave superconductivity pairing to induce  $p + ip$  chiral topological superconductor (TSC) or add voltage gate to change the chemical potential of edge states. The lattice model Hamiltonian for QAHI we adopt is as follows:

$$H_{QAHI} = \sum_{\mathbf{k}} c_{\mathbf{k}}^{\dagger} [(A \sin k_x \sigma_x + A \sin k_y \sigma_y + (M - B(\cos k_x + \cos k_y)) \sigma_z - \mu] c_{\mathbf{k}}, \quad [1]$$

where  $c_{\mathbf{k}} = (c_{\mathbf{k}\uparrow}, c_{\mathbf{k}\downarrow})^T$  are fermion operators in momentum space and  $\sigma_x$ ,  $\sigma_y$  and  $\sigma_z$  are Pauli matrices. We work in the dimensionless unit with lattice constant  $a = 1$  and set  $A = 1$ ,  $B = 5/2$ ,  $M = 4$  and  $\mu = 0$ . The band parameters are chosen such that the valence band has a non-trivial Chern number and therefore describe a QAHI. In the calculation for the QAHI-TSC-QAHI junction or the Corbino junction, we write the above Hamiltonian in the real space with an open boundary condition at the edges between the junction and the vacuum.

The  $p + ip$  TSC is realized by adding an s-wave superconductivity pairing  $\sum_{\mathbf{r}} \frac{1}{2} \Delta(\mathbf{r}) c_{\mathbf{r}}^T i \sigma_y c_{\mathbf{r}} + h.c$  into the Hamiltonian Eq.(1), where  $c_{\mathbf{r}} = (c_{\mathbf{r}\uparrow}, c_{\mathbf{r}\downarrow})^T$  are fermion operators in the real space. We choose to set  $\Delta(\mathbf{r}) = \Delta = 2$  in the superconducting regions, which drives the regions into a  $p + ip$  TSC. We model the static electrical potential induced by voltage gate with a chemical potential term  $\sum_{\mathbf{r}} V(\mathbf{r}) c_{\mathbf{r}}^{\dagger} c_{\mathbf{r}}$ , where  $V(\mathbf{r}) = V_G$  inside the gated region  $V(\mathbf{r}) = 0$  outside. The full model Hamiltonian can be summarized as

$$H = H_{QAHI} + \sum_{\mathbf{r}} \frac{1}{2} [\Delta(\mathbf{r}) c_{\mathbf{r}}^T i \sigma_y c_{\mathbf{r}} + h.c] + \sum_{\mathbf{r}} V(\mathbf{r}) c_{\mathbf{r}}^{\dagger} c_{\mathbf{r}}. \quad [2]$$

In all simulations, the model Hamiltonian will be kept at the fixed parameters where  $a = 1$ ,  $A = 1$ ,  $B = 5/2$ ,  $M = 4$ ,  $\mu = 0$  and  $\Delta = 2$ . Several useful quantities are the Fermi velocity  $v_F$  of the edge modes, which is equal to 1 at zero chemical potential. The energy gap is  $E_g = 2$  for the QAHI regions, and is 1 in the TSC regions.

### 2. Entanglement entropy during the propagation of $\gamma_i$

In this section, we discuss the entanglement entropy change of the QAHI-TSC-QAHI junction during the propagation of an incident electron from lead 1. In the case of the Majorana zero mode(MZM), if one splits a system into two subsystems  $A$  and its complement  $A^c$ , the braiding of one MZM in subsystem  $A$  with another MZM in subsystem  $A^c$  creates an entanglement entropy  $\log 2$  for the subsystem  $A$ . This is also expected to be true in our case of propagation of chiral Majorana fermion wave packets. Indeed, a nonvanishing increment in the value of entanglement entropy is a generic signature of non-Abelian transformations (gate operations).

We design the Hamiltonian defined in Eq.(2) for a QAHI-TSC-QAHI junction on a lattice as shown in Fig. S1. The length of each QAHI region in  $x$  direction is  $L_{QAHI}$  while the length of TSC region in  $x$  direction is  $L_{TSC}$ . A cut along  $y$  direction in the TSC region is made at a distance  $L_{cut}$  to the boundary of TSC and the left QAHI. We define subsystem  $A$  as the subsystem to the left of the cut and we denote its complement  $A^c$  in Fig. S1. The entanglement entropy of subsystem  $A$  is given by

$$S_E = -Tr(\rho_A \log \rho_A), \quad [3]$$

where  $\rho_A$  is the reduced density matrix of the quantum state of subsystem A. With the BdG Hamiltonian adopted, the system consists of non-interacting fermionic quasiparticles. We denote the annihilation operators of the BdG quasiparticle eigenstates as  $\alpha_m$ ,  $m = 1, \dots, n$ . The many-particle state for the fermi sea of the system is then  $|0\rangle$  satisfying  $\alpha_m |0\rangle = 0$ .

We then consider the evolution of an electron wave packet state injected from lead 1, given by  $|\Psi(t)\rangle = \beta^{\dagger}(t)|0\rangle$ , where  $\beta^{\dagger}(0)$  is a chosen creation operator of an electron wave packet at time  $t = 0$  located near lead 1 on the QAHI edge, and  $\beta^{\dagger}(t) = e^{iHt} \beta^{\dagger}(0) e^{-iHt}$  is its time evolution. The wave packet is restricted within an energy window  $[0, v_F \Delta p]$ , which is smaller than the minimal bulk gap of the system.

The entanglement entropy of the noninteracting fermion states (i.e., Slater determinant states)  $|\Psi(t)\rangle$  and  $|0\rangle$  are given by (1, 2)

$$S_E(t) = - \sum_{\alpha} C_{\alpha}(t) \log C_{\alpha}(t), \quad S_{E0} = - \sum_{\alpha} C_{\alpha}^0 \log C_{\alpha}^0, \quad [4]$$

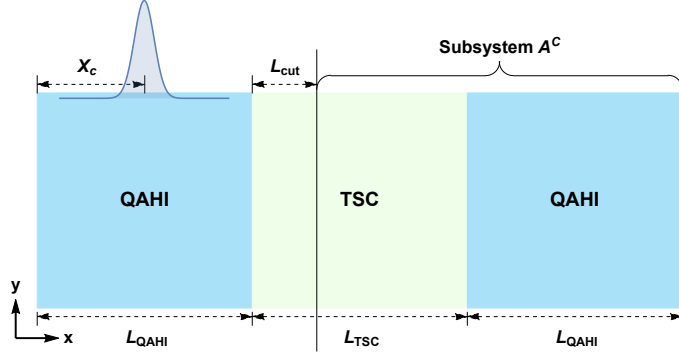

**Fig. S1.** The geometry of a QAHI/TSC/QAHI junction. We align the QAHI regime, TSC regime and the other QAHI regime in the x direction. The length of each QAHI regime in x direction is  $L_{QAHI}$  while the length of TSC regime in x direction is  $L_{TSC}$ . A cut along y direction at the TSC regime is made at a distance  $L_{cut}$  to the boundary of TSC and the left QAHI. We define subsystem  $A$  as the subsystem to the left of the cut and we denote its compliment  $A^C$ . For illustration purpose, we only label the compliment subsystem  $A^C$ . The position of the initial wave packet is centered at a distance  $X_c$  to the boundary of vacuum and the left QAHI. The simulation of Fig. 1E in the main text is run at the geometry parameters  $L_{QAHI} = 30$ ,  $L_{TSC} = 20$ ,  $X_c = 10$  and  $L_{cut} = 10$ .

respectively, where  $C_\alpha(t)$  and  $C_\alpha^0$  are eigenvalues of the correlation matrices defined as follows:

$$C_{i_s, j_{s'}}(t) = \begin{pmatrix} \langle \Psi(t) | c_{i_s} c_{j_{s'}}^\dagger | \Psi(t) \rangle & \langle \Psi(t) | c_{i_s} c_{j_{s'}} | \Psi(t) \rangle \\ \langle \Psi(t) | c_{i_s}^\dagger c_{j_{s'}}^\dagger | \Psi(t) \rangle & \langle \Psi(t) | c_{i_s}^\dagger c_{j_{s'}} | \Psi(t) \rangle \end{pmatrix},$$

$$C_{i_s, j_{s'}}^0 = \begin{pmatrix} \langle 0 | c_{i_s} c_{j_{s'}}^\dagger | 0 \rangle & \langle 0 | c_{i_s} c_{j_{s'}} | 0 \rangle \\ \langle 0 | c_{i_s}^\dagger c_{j_{s'}}^\dagger | 0 \rangle & \langle 0 | c_{i_s}^\dagger c_{j_{s'}} | 0 \rangle \end{pmatrix}. \quad [5]$$

Here  $c_{i_s}$  is the electron annihilation operator on site  $i$  in the subsystem  $A$ , while  $s, s'$  are the spin indices. The correlation matrix  $C^0$  of the fermi sea can be calculated from the eigenstate operators  $\alpha_m$ . Once the commutators of  $c_{i_s}, c_{i_s}^\dagger$  with the  $\beta(t), \beta^\dagger(t)$  are determined, the correlation matrix  $C(t)$  of the wave packet state can be calculated based on  $C^0$ , and the entanglement entropy can be calculated numerically.

We calculate the time evolution of the entanglement entropy  $S_E(t) - S_{E0}$  using geometry parameters  $L_{QAHI} = 30$ ,  $L_{TSC} = 20$ ,  $X_c = 10$  and  $L_{cut} = 10$ . We set the wave packet to contain quasiparticle states in an energy window  $[0, 0.75]$ . The wave packet is created by projecting an electron wave packet onto the quasiparticle states in this energy window. Summary of the geometry parameters is given in Fig. S1, and the evolution of the entanglement entropy is plotted in Fig. 1E of the main text. We can clearly that after  $t = 60$  when the wave packet has left the TSC regime, the entanglement entropy increase of subsystem  $A$  is quantized at  $\log 2$ .

### 3. Calculation of the two terminal conductance

In this supplementary section, we briefly review the calculation of the two terminal conductance for the Corbino junction. The two terminal conductivity from the lead 1 to the lead 2 can be obtained from the generalized Landauer-Buttiker formula(3):

$$I_i = \frac{e^2}{h} [(1 - R^i + R_A^i)(V_i - V_{SC}) - \sum_{j \neq i} (T^{ji} - T_A^{ji})(V_j - V_{SC})], \quad i = 1, 2, \quad [6]$$

where  $I_i$  is the current flowing out of the lead  $i$ ,  $V_i$  is the voltage of the lead  $i$ , and  $T_{ij}, T_A^{ij}$  are the normal transmission and Andreev transmission probabilities from leads  $i$  to  $j$  ( $j \neq i$ ), while  $R^i$  and  $R_A^i$  are the normal reflection and Andreev reflection from the lead  $i$  back to itself, respectively. As a consistency check, the conductance  $\sigma_{12}$  of the Corbino junction calculated this way should agree with our prediction in the main text based on chiral Majorana fermion propagations.

We simulate the time evolution of an electron wave packet initialized inside the lead 1 region using the Hamiltonian from Eq. (2). At the time when the wave packet reflects (transmits) to the lead 1 (lead 2) neighbourhoods, we stop the time evolution and compute the probability of reflection and transmission, namely  $T_{ij}, T_A^{ij}, R^i$  and  $R_A^i$ , from the wave function. Note that if we connect the electron source directly across leads 1 and 2, we also have an additional constrain:

$$I_1 = -I_2 = I. \quad [7]$$

From Eq. (6) and Eq. (7), we can then solve for two terminal conductivity  $\sigma_{12} = (V_1 - V_2)/I$ .

### 4. Decoherence effect from non-monochromaticity

In the main text, we have discussed the decoherence effect from the non-monochromaticity of the incident electron wave packet. The non-monochromaticity is described by the momentum uncertainty  $\Delta p$  of the electron wave packet together with a length scale characterizes the length difference  $\Delta L$  of the four chiral Majorana modes  $\gamma_i$  ( $1 \leq i \leq 4$ ). In this section, we shall discuss

the precise definition of these parameters in simulation and the method to study the dependence of oscillation amplitude on them.

As shown in Fig. S2, we put the Corbino junction on a cylindrical lattice with left and right vertical dashed lines identified, which is equivalent to the Corbino geometry. We can consider an incident electron wave packet from the lead 1. In simulation, we obtain a wave packet of momentum uncertainty  $\Delta p$  in the following way. We initialize an electron wave packet broader than  $\hbar/\Delta p$ . Then we project this wave function onto the energy eigenspace of Hamiltonian from Eq.(2) in the energy window  $v_F[-\Delta p/2, +\Delta p/2]$  and normalize the projected wave function as  $\psi(0)$ . We shall define  $\psi(0)$  as the initial electron wave packet with momentum uncertainty  $\Delta p$ . Notice that this initial condition is slightly different from the calculation for entanglement entropy in section 2 because the negative energy state represents a hole of quasiparticle which is impossible to generate from ground state with no quasiparticles at zero temperature. Here we are considering the non-monochromaticity of electron wave packet from the finite temperature effect and this initial condition is physical.

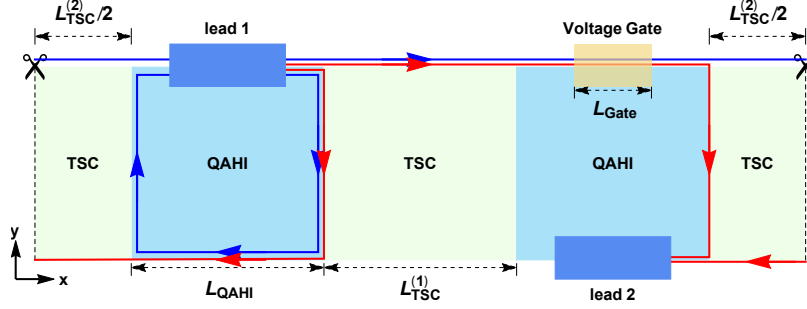

**Fig. S2.** Illustration of chiral Majorana interferometry: A band of QAHI with two TSC regimes induced by proximity to a s-wave superconductor. The lengths of QAHI regimes, TSC regimes and the voltage gate regime are denoted as  $L_{QAHI}$ ,  $L_{TSC}^{(1)}$ ,  $L_{TSC}^{(2)}$  and  $L_{Gate}$ , respectively. If one consider an incident electron wave packet from the lead 1, we can decompose it into a superposition of two Majorana fermions. Two red lines are paths for those Majorana fermions to travel from the lead 1 to the lead 2 while two blue lines are paths for those Majorana fermions to travel back to the lead 1. The probability for a charge from the lead 1 to transmit/reflect is contributed by the red/blue paths. The path difference of two transmitted/reflected paths from the lead 1 is  $\Delta L = |L_{TSC}^{(1)} - L_{TSC}^{(2)}|$ .

A suitable perspective is to consider the electron wave packet as a superposition of wave packets of two Majorana fermions. Upon time evolution, the fate of the two Majorana fermions is either recombination to a particle/hole at the lead 1 or at the lead 2. For the process that the wave packet ends up back at the lead 1, the probability is contributed by two paths shown as two blue lines in Fig. S2. In a precise fashion, this can be interpreted as an interferometry of chiral Majorana fermions: the electron wave packet passes through a "beam splitter", travels through two arms as through the chiral Majorana mode and recombines at the lead 1. The length difference of the two arms of the interferometry is  $\Delta L^{(1)} = |L_{TSC}^{(1)} + L_{TSC}^{(2)} - 2L_y|$  and we can expect the interference effect in the probability of propagating back to be measurable when  $\Delta L^{(1)}\Delta p < \hbar$ . For the process that the wave packet transmits to the lead 2, similarly, the probability is contributed by two paths shown as two red lines in Fig. S2. The length difference of the two paths is  $\Delta L^{(2)} = |L_{TSC}^{(1)} - L_{TSC}^{(2)}|$  and the condition for the interference is  $\Delta L^{(2)}\Delta p < \hbar$ . For illustration purpose, we study the case when  $L_y = L_{TSC}^{(1)}$  so that  $\Delta L^{(1)} = \Delta L^{(2)} = \Delta L$  so that a unique length scale  $\Delta L$  is defined.

In simulation, we fix the geometry parameters at  $L_{TSC}^{(1)} = L_y = 20$ ,  $L_{QAHI} = 30$  and  $L_{Gate} = 20$  and vary  $\Delta L = L_{TSC}^{(2)} - L_{TSC}^{(1)}$  from 0 to 30. For each  $L_{TSC}^{(2)}$ , we initialize a wave packet at the lead 1 region with momentum uncertainty  $\Delta p/v_F\hbar = 0.6$ . We can simulate the time evolution of the wave packet and obtain  $\sigma_{12}$  as described in the previous section for  $V_G$  from 0 to 1. At  $\Delta L = 0$  ( $\Delta L\Delta p/\hbar = 18$ ) and  $\Delta L = 30$  ( $\Delta L\Delta p/\hbar = 18$ ), the dependence of  $\sigma_{12}$  on  $V_G$  is shown in Fig. 3A in the main text with an oscillation feature. We can also observe similar oscillation for other  $\Delta L$  and the peak-to-valley oscillation amplitude has a dependence on  $\Delta L\Delta p/\hbar$  shown in Fig. 3A in the main text.

## 5. Phase shift of $\phi_G$ due to nonzero chemical potential $\mu$

In this section we discuss the phase shift of  $\phi_G$  in the two terminal conductance  $\sigma_{12}$  of the Corbino junction due to chemical potential and static disorders on the QAHI edges. When the chemical potential  $\mu$  on a QAHI edge is nonzero, the Hamiltonian of the corresponding charged chiral edge state  $\psi$  is

$$H_F(x) = -i\hbar v_F \psi^\dagger(x) \partial_x \psi(x) - \mu(x) \psi^\dagger(x) \psi(x). \quad [8]$$

Solving the Schrödinger equation yields an electron wave function

$$\psi(x, t) = \exp\left[\frac{i}{\hbar v_F} \int_0^x \mu(x') dx'\right] \varphi_0(x - v_F t), \quad [9]$$

where  $\varphi_0(x)$  is an arbitrary function of  $x$ . Therefore, a chiral fermion wave packet accumulates a phase  $\phi = \int_{x_1}^{x_2} \mu(x) dx$  after propagation from  $x_1$  to  $x_2$  which is fixed by the function of chemical potential  $\mu(x)$ . In contrast, a chiral Majorana fermion always has zero chemical potential as ensured by the particle-hole symmetry of TSC.

In the Corbino junction as shown in Fig. 2A of the main text, assume charged chiral state  $\psi_\alpha$  ( $\alpha = A, B, C, D$ ) accumulates an additional chemical potential induced phase  $\phi_\alpha$  during propagation on the corresponding QAHI edge. In the odd fermion parity subspace  $\{|0_A 1_B\rangle, |1_A 0_B\rangle\}$ , the total unitary transformation becomes

$$|\psi_f\rangle = \begin{pmatrix} e^{-i\phi_B} & 0 \\ 0 & e^{-i\phi_A} \end{pmatrix} ZHR_{\phi_G} \begin{pmatrix} e^{-i\phi_D} & 0 \\ 0 & e^{-i\phi_C} \end{pmatrix} ZH|\psi_i\rangle, \quad [10]$$

which is equivalent to insertion of two additional phase gates. As a result, an initial state  $|\psi_i\rangle = |1_A 0_B\rangle$  transforms into a final state

$$|\psi_f\rangle = e^{-i(\phi_G + \phi_D + \phi_C)/2} \left( e^{-i\phi_B} \cos \frac{\phi_G + \phi_0}{2} |0_A 1_B\rangle + ie^{-i\phi_A} \sin \frac{\phi_G + \phi_0}{2} |1_A 0_B\rangle \right), \quad [11]$$

where  $\phi_0 = \phi_D - \phi_C$ . Therefore, the conductance  $\sigma_{12}$  becomes

$$\sigma_{12} = (1 - |\langle\psi_f|\psi_i\rangle|^2) \frac{e^2}{h} = \frac{1 + \cos(\phi_G + \phi_0)}{2} \frac{e^2}{h}. \quad [12]$$

## 6. Bloch sphere illustration of the Corbino junction

In this section, we present an illustration for the time evolution of the qubit on its Bloch sphere after injecting an electron wave packet from lead 1. As shown in Fig. 2 in the main text, the charged chiral fermion modes on the QAHI edges are labeled as  $\psi_A, \psi_B, \psi_C$  and  $\psi_D$ . If we regard the charged chiral edge modes of QAHI region I ( $\psi_A$  and  $\psi_C$ ) as the data qubit, and those of QAHI region III ( $\psi_B$  and  $\psi_D$ ) as the ancilla qubit, the junction can be viewed as a series of quantum gates as shown in Fig. 2B in the main text, with a total unitary evolution  $|\psi_f\rangle = ZHR_{\phi_G}ZH|\psi_i\rangle$ . The initial state of the wave packet is  $|1_A 0_B\rangle$  occupying a  $\psi_A$  fermion state. The electron wave packet will then approach the TSC II region and leave this region as chiral fermion mode  $\psi_C$  or  $\psi_D$ . If we define the qubit state  $(|0\rangle, |1\rangle)$  as  $(|0_A 1_B\rangle, |1_A 0_B\rangle)$  before the wave packet approaches the TSC II region and  $(|0_C 1_D\rangle, |1_C 0_D\rangle)$  after the wave packet leaves the TSC II region, the time evolution of such a process can be viewed as the operator  $ZH$  acting on a qubit which is initialized at  $|1\rangle$  state at north pole of its Bloch sphere. The  $ZH$  operator is a rotation of  $\pi/2$  along  $y$  axis and upon the operation, the qubit rotates to  $+x$  direction on the Bloch sphere. After leaving the TSC II region, the wave packet may enter the voltage gate and the effect of voltage gate is to contribute additional phase  $\phi_G$  to state  $|0_C 1_D\rangle$  while 0 to state  $|1_C 0_D\rangle$  and therefore is a rotation of  $-\phi_G$  along  $z$  axis in the Bloch sphere of qubit  $(|0_C 1_D\rangle, |1_C 0_D\rangle)$ . Before reaching leads, the wave packet must also approach the TSC IV region and leave this region as chiral fermion mode  $\psi_A$  or  $\psi_B$ . The time evolution of such a process can be viewed as the operator  $ZH$  rotating the qubit by  $\pi/2$  along  $y$  axis on the Bloch sphere if we define the qubit state  $(|0\rangle, |1\rangle)$  in as  $(|0_C 1_D\rangle, |1_C 0_D\rangle)$  before the wave packet approaches the junction and  $(|0_A 1_B\rangle, |1_A 0_B\rangle)$  after the wave packet leaves the junction. From Fig. S3(A-D), we can clearly see the time evolution of the qubit on the Bloch sphere of the process that we have described in this paragraph and the final state at polar angle  $\pi - \phi_G$  and azimuthal angle  $\pi/2$  on the Bloch sphere. This is an illustrative derivation of Eq. (4) in the main text.

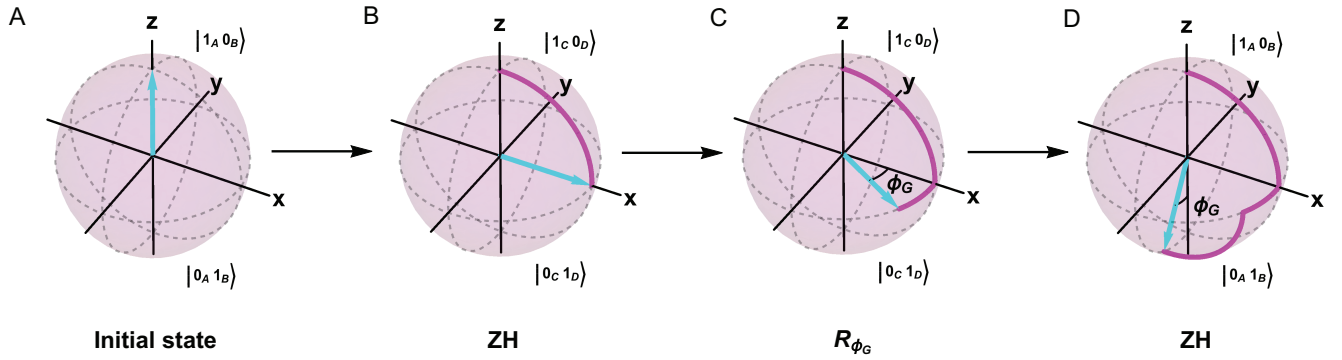

**Fig. S3. The time evolution of a qubit.** (A). The electron wave packet is ejected from the lead 1 and occupies one state of  $\psi_A$  fermion. The qubit at this time is initialized at  $|1_A 0_B\rangle$ . (B). The effect of the QAHI I–TSC II–QAHI III junction is a rotation of  $\pi/2$  along  $y$  axis on the Bloch sphere if we define the qubit state  $(|0\rangle, |1\rangle)$  as  $(|0_A 1_B\rangle, |1_A 0_B\rangle)$  before the wave packet approaches the junction and  $(|0_C 1_D\rangle, |1_C 0_D\rangle)$  after the wave packet leaves the junction. (C). The effect of the voltage gate is a rotation of  $-\phi_G$  along  $z$  axis in the Bloch sphere of qubit  $(|0_C 1_D\rangle, |1_C 0_D\rangle)$ . (D). The effect of the QAHI III–TSC IV–QAHI I junction is a rotation of  $\pi/2$  along  $y$  axis on the Bloch sphere if we define the qubit state  $(|0\rangle, |1\rangle)$  as  $(|0_C 1_D\rangle, |1_C 0_D\rangle)$  before the wave packet approaches the junction and  $(|0_A 1_B\rangle, |1_A 0_B\rangle)$  after the wave packet leaves the junction.

## 7. Understanding of the unitary transformation via vortex operators

Hereby we show the propagation of chiral Majorana wave packets on the TSC edges are physically equivalent to the non-Abelian braiding of  $\pi$ -flux vortices (which trap MZMs) in the TSC bulk.

The chiral TSC edge is known to be described by the chiral Ising conformal field theory (CFT). By defining  $z = v_F^{-1}x - (t - i\delta)$  and  $\bar{z} = v_F^{-1}x + (t - i\delta)$ , the edge action takes the form

$$S = \int dx dt \gamma(x, t) \bar{\partial} \gamma(x, t),$$

where we use  $\partial = \partial_z$  and  $\bar{\partial} = \partial_{\bar{z}}$  for short. For imaginary time  $t = -i\tau$ , the above  $z$  and  $\bar{z}$  are simply the holomorphic and antiholomorphic coordinates in the  $x, \tau$  plane. The equation of motion then indicates  $\gamma(x, t) = \gamma(z)$ . In addition, the chiral Ising CFT contains the chiral vortex operator  $\sigma(x, t) = \sigma(z)$ , while  $\gamma$  and  $\sigma$  satisfy the Ising fusion rules

$$\sigma \times \sigma = 1 + \gamma, \quad \gamma \times \gamma = 1, \quad \sigma \times \gamma = \sigma. \quad [13]$$

In particular, two  $\sigma$  fields may fuse into either a bosonic or a fermionic field, thus  $\sigma$  is said to be non-Abelian.

To get a better understanding of the vortex operator  $\sigma$ , we first recall the nonchiral Ising CFT with action

$$S_{\text{nonchiral}} = \int dx dt [\gamma(z) \bar{\partial} \gamma(z) + \bar{\gamma}(\bar{z}) \partial \bar{\gamma}(\bar{z})],$$

which describes the critical point of the 1 + 1D transverse field Ising model, where  $\gamma(z)$  and  $\bar{\gamma}(\bar{z})$  are the right and left moving Majorana fermion fields, respectively. The nonchiral vortex operator is simply the Ising spin  $s_z(x, t) = \sigma(z) \bar{\sigma}(\bar{z})$ , which is the product of the holomorphic vortex  $\sigma(z)$  and the antiholomorphic vortex  $\bar{\sigma}(\bar{z})$ . When we recover the lattice Ising model defined on sites  $x = na$  where  $n$  is integral, the right-moving and left-moving Majorana fields  $\gamma$  and  $\bar{\gamma}$  are well-defined at low energies, and the Ising spin can be expressed in terms of the Majorana fermion fields via a Jordan-Wigner transformation

$$s_z(x, t) = \left[ \prod_{x' < x} i \bar{\gamma}(x', t) \gamma(x', t) \right] [\gamma(x, t) + \bar{\gamma}(x, t)], \quad [14]$$

where  $i \bar{\gamma}(x', t) \gamma(x', t)$  gives the fermion parity of site  $x'$  at low energies. Therefore, one can roughly decompose it into the product of the following holomorphic and antiholomorphic chiral vortex fields:

$$\sigma(x, t) = \prod_{x' \leq x} \gamma(x', t), \quad \bar{\sigma}(x, t) = \prod_{x' \leq x} \bar{\gamma}(x', t). \quad [15]$$

In this way, the chiral vortex fields  $\sigma(z)$  and  $\bar{\sigma}(\bar{z})$  can be understood as half-infinite strings of chiral Majorana fields  $\gamma$  and  $\bar{\gamma}$  in the interval  $[-\infty, x]$  at time  $t$ , respectively. The chiral Ising CFT fusion rule is then easy to understand in the lattice picture: when the lattice difference  $|x_1 - x_2| \rightarrow 0$ , the operator product  $\sigma(x_1, t) \sigma(x_2, t) = \prod_{x_1 < x \leq x_2} \gamma(x, t)$ , which is either bosonic or fermionic depending on  $(x_2 - x_1)/a$  is even or odd. Furthermore, when a Majorana fermion  $\gamma$  is moved around a vortex field  $\sigma$  in the complex  $z$  plane, it necessarily crosses the Majorana string (exchange with a Majorana field on the string) once, and acquires a sign change. Therefore,  $\sigma$  behaves as a  $\pi$  flux vortex in the complex  $z$  plane for  $\gamma$ .

In the setup of our main text Fig. 1A, the complex chiral fermion  $\psi_A$  on the lower left QAH edge is equivalent to two copies of the chiral Ising CFT with the same chirality, namely, one can define two chiral Majorana fields  $\gamma_1$  and  $\gamma_2$  satisfying  $\psi_A = \gamma_1 + i\gamma_2$ . Accordingly, their vortex fields  $\sigma_1$  and  $\sigma_2$  can be understood as half-infinite strings of  $\gamma_1$  and  $\gamma_2$ , respectively (we do not need to worry about boundary conditions since all edges in our setup are open and connected to metallic leads). The incident qubit A, defined by the occupation number of an electron wave packet at  $x$  on edge A and at time  $t$ , is then equivalent to the insertion of two vortices fields, one  $\sigma_1(x, t)$  and one  $\sigma_2(x, t)$ , which together spans a 2D Hilbert space. More explicitly, the operator product  $\lim_{x \rightarrow y} \sigma_1(x, t) \sigma_2(x', t)$  tends to  $(-1)^{n_F} \gamma_1(x)$ ,  $(-1)^{n_F}$  or  $(-1)^{n_F} \gamma_2(x)$  depending on  $(x - x')/a = 1, 0$  or  $-1$ , respectively, where  $n_F = \int_{-\infty}^x i \gamma_1(x') \gamma_2(x') dx'$  is the fermion number on the left of  $x$ . Therefore,  $\sigma_1$  and  $\sigma_2$  fuses into a 2D Hilbert space spanned by two local Majorana operators (wave packets)  $\gamma_1(x)$  and  $\gamma_2(x)$ . The injection of an electron at lead 1 (state  $|1_A\rangle$ ) corresponds to injection of  $\sigma_1$  and  $\sigma_2$  in the fermionic fusion channel, and the injection of "nothing" (state  $|0_A\rangle$ ) is the insertion of  $\sigma_1$  and  $\sigma_2$  in the bosonic fusion channel. We note that since the injected electron wave packet state is a charge eigenstate (i.e., carrying a definite charge), it can only be split into one  $\sigma_1$  and one  $\sigma_2$ , instead of two  $\sigma_1$  (or two  $\sigma_2$ ) vortices. Two  $\sigma_1$  fields will fuse into a Bogoliubov fermion state which is not a charge eigenstate.

We now show that the propagation of chiral Majorana wave packets on the edges is physically equivalent to the braiding/fusion of  $\pi$ -flux vortices in the bulk of the TSC, which is extensively studied in the literature. As shown in Fig. S4A, in the 2 + 1D spacetime of the device, a vortex  $\sigma$  inserted at time  $t$  on the TSC boundary can be adiabatically connected with a  $\pi$  flux vortex in the TSC bulk via a Wilson loop. (In fact, a vortex on the boundary has to continue into the bulk as a Wilson loop to be a legal object in the bulk topological field theory, and the Wilson loop is nothing but the world line of the vortex.) In the topological quantum field theory (TQFT) description of the bulk TSC, all the physical processes are determined by the configuration of Wilson loops in the spacetime. In particular, given two Wilson loops connecting two bulk vortices and two boundary vortices, exchange of two vortices on the boundary  $(t, x)$  sheet or braiding of two vortices in the bulk  $(x, y)$  plane lead to the same change of the Wilson loop configuration, so they are physically equivalent. Similarly in our case, the creation and fusion of four vortices on the TSC boundary (Fig. S4C, with bulk doing nothing) is equivalent to creation and fusion of four vortices in the TSC bulk (Fig. S4D, with boundary doing nothing), since they yields the same change of Wilson loop configuration in the spacetime (from Fig. S4A to Fig. S4B).

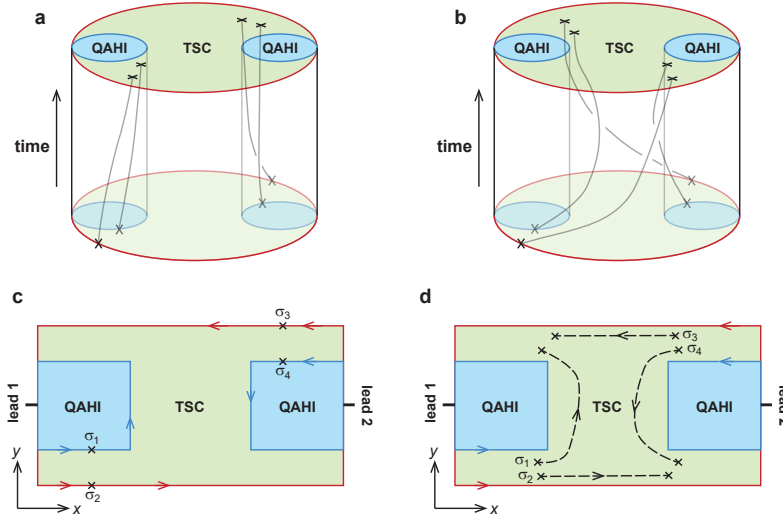

**Fig. S4. Equivalence between propagation of edge chiral Majorana fermions and bulk braiding of vortices.** (A) The two qubits A and B are equivalent to four vortex operators  $\sigma_i$  on the boundary of the TSC at a particular time  $t$ . Each vortex on the boundary can be connected with a bulk vortex via a Wilson loop. (B) The Wilson loop configuration after a bulk vortex braiding and fusion, which is equivalent to that after a boundary evolution as we described in the main text. (C) The incident states at edges A and B can be viewed as insertion of four vortices  $\sigma_i$ . (D) By dragging the four vortices into the TSC bulk (along with the incident fermions they trap), and then braid and fuse the vortices in the bulk, one obtain the same final states as that obtained after propagation of chiral Majorana wave packets on the edges.

Therefore, one can imagine the following process which is equivalent to the propagation of chiral Majorana wave packets (Fig. S4C and S4D): when an incident electron on QAH edge A encounters the TSC boundary, one can create two vortices  $\sigma_1$  and  $\sigma_2$  at the position of the incident electron, then drag the two vortices into the TSC bulk, and trap the incident electron into them at the same time. Similarly, we can create two vortices  $\sigma_3$  and  $\sigma_4$  at the corner of QAH edge B and drag them into the bulk TSC. Then we braid and fuse the vortices as shown in Fig. S4D, and then drag the fused pair of vortices to QAH edges C and D, respectively. In such a process, the propagation of chiral Majorana fermions on the TSC edge is replaced by braiding of vortices in the bulk, but the outcome remains the same. This shows the two processes are topologically equivalent.

In the end, we briefly clarify the possible conceptual confusions about MZM, Majorana fermion and Ising anyon (vortex). First of all, MZMs or Majorana fermions in any other context (e.g., chiral Majorana fermion on 1D edge) are fermions, and obey fermionic statistics which belongs to *Abelian statistics*. They satisfy the fusion rule  $\gamma \times \gamma = 1$ , namely, the product of two neighbouring Majorana fermion operators gives a topologically trivial bosonic operator. In a topological state of matter, the bosonic operator does not change the topological ground state, thus lives in a 1-dimensional Hilbert space (the ground state), and this means the Majorana fermion operator  $\gamma$  is Abelian. Besides, the Majorana fermion operator  $\gamma$  satisfy the fermionic statistics that exchanging two fermions yields a phase factor  $R_{\gamma\gamma}^1 = -1$ .

In contrast, the Ising anyons (or vortices)  $\sigma$  are non-Abelian anyons. In the bulk of  $p + ip$  chiral TSC,  $\sigma$  is simply a superconducting vortex where the order parameter  $\Delta$  has a  $2\pi$  phase winding. They satisfy fusion rules  $\sigma \times \sigma = 1 + \gamma$ , which means the product of two nearby  $\sigma$  operators can composite into either a bosonic operator 1 or a fermionic operator  $\gamma$ . Therefore, two  $\sigma$  fields occupy a 2-dimensional Hilbert space, so they obey non-Abelian statistics. In the Ising topological quantum field theory, the braiding of two  $\sigma$  fields acquires a phase depending on their fusion channel: when two  $\sigma$  are in the fusion channel 1 and  $\gamma$ , the braiding phases they acquired are  $R_{\sigma\sigma}^1 = e^{i\theta}$  and  $R_{\sigma\sigma}^\gamma = e^{i\theta+i\pi/2}$ , respectively. The two fusion channels thus differ by a  $e^{i\pi/2}$  braiding phase.

In the bulk of  $p + ip$  TSC, a vortex  $\sigma$ , namely an Ising anyon, traps a MZM  $\gamma$  at the vortex core, which can be seen by solving the Bogoliubov-de Gennes Hamiltonian of the TSC. For this reason, in many discussions the Ising anyon  $\sigma$  is not carefully distinguished with the MZM  $\gamma$ . We emphasize that they are indeed closely related, but are quite different concepts.  $\sigma$  is a non-Abelian Ising anyon, while  $\gamma$  is Abelian. Their relation can be stated as follows: the *fusion* of two Ising anyons  $\sigma_1$  and  $\sigma_2$  yields a single fermion degree of freedom, which can be described by the *superposition* of MZM operators  $\gamma_1$  and  $\gamma_2$ .

## References

1. Peschel I (2003) Calculation of reduced density matrices from correlation functions. *Journal of Physics A: Mathematical and General* 36(14):L205.
2. Peschel I, Eisler V (2009) Reduced density matrices and entanglement entropy in free lattice models. *Journal of Physics A: Mathematical and Theoretical* 42(50):504003.
3. Entin-Wohlman O, Imry Y, Aharony A (2008) Conductance of superconducting-normal hybrid structures. *Phys. Rev. B* 78(22):224510.
